# Supplementary material for: Biphenyl-2,4,6,3′,5′-pentacarboxylic acid as a tecton for six new Co(ii) coordination polymers: pH and N-donor ligand-dependent assemblies, structure diversities and magnetic properties
Source: Royal Society of Chemistry journal article supplement (doi:10.1039/c5dt02147b), 2015-01-01
Supplement: c5dt02147b1.pdf [file c5dt02147b1.pdf]

***Electronic Supplementary Information for***

**Biphenyl-2,4,6,3',5'-pentacarboxylic Acid as Tecton for Six new Co(II)  
Coordination Polymers: PH and N-donor Ligands-Dependent Assemblies,  
Structure Diversities And Magnetic Properties**

Min-Le Han<sup>†,‡</sup>, Liang Bai<sup>‡</sup>, Ping Tang<sup>‡</sup>, Xue-Qian Wu<sup>‡</sup>, Ya-Pan Wu<sup>‡</sup>, Jun Zhao<sup>‡</sup>, Dong-Sheng Li<sup>\*‡</sup>  
and Yao-Yu Wang<sup>†</sup>

<sup>†</sup> *Key Laboratory of Synthetic and Natural Functional Molecule Chemistry of the Ministry of Education, College of Chemistry & Materials Science, Northwest University, Xi'an 710069, P. R. China.*

<sup>‡</sup> *College of Materils & Chemical Engineering, Collaborative Innovation Center for Microgrid of New Energy of Hubei Province, China Three Gorges University, Yichang, 443002, China. Tel./Fax: +86-717-6397506; E-mail address: lidongsheng1@126.com (D.-S. Li).*

**Table S1.** Selected Bond Lengths (Å) and Angles (°) for **1–6**.

| <b>1</b>          |           |                   |            |
|-------------------|-----------|-------------------|------------|
| Co(1)-O(1)        | 2.055(3)  | Co(1)-O(2)#1      | 2.116(3)   |
| Co(1)-N(1)        | 2.128(3)  | Co(1)-N(2)        | 2.126(3)   |
| Co(1)-N(4)        | 2.145(3)  | Co(1)-N(3)        | 2.152(3)   |
| O(1)-Co(1)-O(2)#1 | 94.64(10) | O(1)-Co(1)-N(1)   | 92.90(10)  |
| O(2)#1-Co(1)-N(1) | 86.78(10) | O(1)-Co(1)-N(2)   | 169.43(10) |
| O(2)#1-Co(1)-N(2) | 81.33(11) | N(1)-Co(1)-N(2)   | 77.18(11)  |
| O(1)-Co(1)-N(4)   | 93.67(11) | O(2)#1-Co(1)-N(4) | 171.22(11) |
| N(1)-Co(1)-N(4)   | 95.66(12) | N(2)-Co(1)-N(4)   | 90.96(12)  |

|                      |            |                    |            |
|----------------------|------------|--------------------|------------|
| O(1)-Co(1)-N(3)      | 91.54(10)  | O(2)#1-Co(1)-N(3)  | 100.39(11) |
| N(1)-Co(1)-N(3)      | 171.24(11) | N(2)-Co(1)-N(3)    | 98.78(11)  |
| N(4)-Co(1)-N(3)      | 76.52(13)  |                    |            |
| <b>2</b>             |            |                    |            |
| Co(1)-O(1)           | 2.066(4)   | Co(1)-O(2)#1       | 2.120(4)   |
| Co(1)-N(2)           | 2.132(5)   | Co(1)-N(1)         | 2.121(5)   |
| Co(1)-N(3)           | 2.143(5)   | Co(1)-N(4)         | 2.162(5)   |
| Co(2)-O(7)           | 1.892(5)   | Co(2)-O(10)#2      | 1.951(5)   |
| Co(2)-O(11)          | 2.032(6)   | Co(2)-O(5)#3       | 2.025(5)   |
| O(1)-Co(1)-O(2)#1    | 95.08(16)  | O(1)-Co(1)-N(2)    | 170.07(19) |
| O(2)#1-Co(1)-N(2)    | 81.79(18)  | O(1)-Co(1)-N(1)    | 93.92(17)  |
| O(2)#1-Co(1)-N(1)    | 87.78(17)  | N(2)-Co(1)-N(1)    | 76.6(2)    |
| O(1)-Co(1)-N(3)      | 89.82(17)  | O(2)#1-Co(1)-N(3)  | 102.26(17) |
| N(2)-Co(1)-N(3)      | 100.0(2)   | N(1)-Co(1)-N(3)    | 168.94(19) |
| O(1)-Co(1)-N(4)      | 92.13(19)  | O(2)#1-Co(1)-N(4)  | 172.60(19) |
| N(2)-Co(1)-N(4)      | 91.4(2)    | N(1)-Co(1)-N(4)    | 93.4(2)    |
| N(3)-Co(1)-N(4)      | 76.1(2)    | O(7)-Co(2)-O(11)   | 103.1(2)   |
| O(7)-Co(2)-O(10)#2   | 117.7(2)   | O(7)-Co(2)-O(5)#3  | 108.3(3)   |
| O(10)#2-Co(2)-O(11)  | 117.3(2)   | O(11)-Co(2)-O(5)#3 | 98.9(2)    |
| O(10)#2-Co(2)-O(5)#3 | 109.7(2)   |                    |            |
| <b>3</b>             |            |                    |            |
| Co(1)-O(1)           | 1.952(2)   | Co(1)-O(6)#1       | 1.958(2)   |
| Co(1)-O(7)#2         | 2.039(3)   | Co(1)-N(1)         | 2.056(3)   |
| O(1)-Co(1)-O(6)#1    | 116.40(11) | O(1)-Co(1)-O(7)#2  | 110.13(11) |
| O(6)#1-Co(1)-O(7)#2  | 122.53(11) | O(1)-Co(1)-N(1)    | 110.50(11) |
| O(6)#1-Co(1)-N(1)    | 99.55(12)  | O(7)#2-Co(1)-N(1)  | 93.77(12)  |
| <b>4</b>             |            |                    |            |
| Co(1)-O(6)#1         | 1.981(2)   | Co(1)-O(1)         | 1.989(2)   |
| Co(1)-O(11)#2        | 1.994(2)   | Co(1)-O(3)         | 2.003(2)   |
| Co(2)-O(5)#3         | 2.051(3)   | Co(2)-O(8)#4       | 2.058(3)   |
| Co(2)-O(2)           | 2.075(2)   | Co(2)-O(1)         | 2.078(2)   |
| Co(2)-N(1)           | 2.110(3)   | Co(3)-O(4)#3       | 2.053(3)   |
| Co(3)-O(9)#4         | 2.096(2)   | Co(3)-O(1)         | 2.109(2)   |

---

|                      |             |                      |            |
|----------------------|-------------|----------------------|------------|
| Co(3)-O(10)#2        | 2.126(2)    | Co(3)-N(2)#2         | 2.153(3)   |
| Co(3)-O(12)          | 2.161(3)    |                      |            |
| O(6)#1-Co(1)-O(1)    | 119.38 (10) | O(6)#1-Co(1)-O(11)#2 | 97.57(11)  |
| O(1)-Co(1)-O(11)#2   | 100.80(10)  | O(6)#1-Co(1)-O(3)    | 105.76(11) |
| O(1)-Co(1)-O(3)      | 113.79(10)  | O(11)#2-Co(1)-O(3)   | 119.16(11) |
| O(5)#3-Co(2)-O(8)#4  | 101.09(14)  | O(5)#3-Co(2)-O(2)    | 93.42(11)  |
| O(8)#4-Co(2)-O(2)    | 164.86(12)  | O(5)#3-Co(2)-O(1)    | 108.72(9)  |
| O(8)#4-Co(2)-O(1)    | 87.68(11)   | O(2)-Co(2)-O(1)      | 91.77(9)   |
| O(5)#3-Co(2)-N(1)    | 95.28(10)   | O(8)#4-Co(2)-N(1)    | 81.46(11)  |
| O(2)-Co(2)-N(1)      | 93.01(10)   | O(1)-Co(2)-N(1)      | 155.18(10) |
| O(4)#3-Co(3)-O(9)#4  | 94.29(13)   | O(4)#3-Co(3)-O(1)    | 91.99(11)  |
| O(9)#4-Co(3)-O(1)    | 92.88(9)    | O(4)#3-Co(3)-O(10)#2 | 90.17(12)  |
| O(9)#4-Co(3)-O(10)#2 | 173.49(10)  | O(1)-Co(3)-O(10)#2   | 91.70(9)   |
| O(4)#3-Co(3)-N(2)#2  | 88.58(11)   | O(9)#4-Co(3)-N(2)#2  | 87.17(10)  |
| O(4)#3-Co(3)-O(12)   | 176.7(4)    | O(9)#4-Co(3)-O(12)   | 83.7(2)    |
| O(1)-Co(3)-O(12)     | 90.8(4)     | O(10)#2-Co(3)-O(12)  | 91.6(2)    |
| N(2)#2-Co(3)-O(12)   | 88.7(4)     | O(10)#2-Co(3)-N(2)#2 | 88.21(10)  |
| O(1)-Co(3)-N(2)#2    | 179.43(10)  |                      |            |

**5**

|                      |            |                     |            |
|----------------------|------------|---------------------|------------|
| Co(1)-O(1)           | 2.036(3)   | Co(1)-N(1)          | 2.100(3)   |
| Co(1)-O(10)#1        | 2.103(3)   | Co(1)-O(11)         | 2.112(3)   |
| Co(1)-O(5)#2         | 2.129(3)   | Co(1)-O(12)         | 2.198(3)   |
| Co(2)-O(9)           | 2.066(3)   | Co(2)-N(4)#3        | 2.106(3)   |
| Co(2)-O(13)          | 2.103(3)   | Co(2)-O(14)         | 2.131(3)   |
| Co(2)-O(12)#1        | 2.140(2)   | Co(2)-O(7)#4        | 2.172(3)   |
| O(1)-Co(1)-N(1)      | 88.86(11)  | O(1)-Co(1)-O(10)#1  | 95.16(11)  |
| N(1)-Co(1)-O(10)#1   | 90.08(11)  | O(1)-Co(1)-O(11)    | 174.77(10) |
| N(1)-Co(1)-O(11)     | 96.27(11)  | O(10)#1-Co(1)-O(11) | 85.86(10)  |
| O(1)-Co(1)-O(5)#2    | 92.53(11)  | N(1)-Co(1)-O(5)#2   | 89.29(11)  |
| O(10)#1-Co(1)-O(5)#2 | 172.27(10) | O(11)-Co(1)-O(5)#2  | 86.54(10)  |
| O(1)-Co(1)-O(12)     | 88.91(10)  | N(1)-Co(1)-O(12)    | 177.48(10) |
| O(10)#1-Co(1)-O(12)  | 91.28(9)   | O(11)-Co(1)-O(12)   | 85.94(10)  |
| O(5)#2-Co(1)-O(12)   | 89.64(9)   | O(9)-Co(2)-N(4)#3   | 91.58(12)  |

---

|                      |            |                      |            |
|----------------------|------------|----------------------|------------|
| O(9)-Co(2)-O(13)     | 91.34(12)  | N(4)#3-Co(2)-O(13)   | 95.51(12)  |
| O(9)-Co(2)-O(14)     | 177.59(11) | N(4)#3-Co(2)-O(14)   | 90.60(12)  |
| O(13)-Co(2)-O(14)    | 87.43(13)  | O(9)-Co(2)-O(12)#1   | 94.98(10)  |
| N(4)#3-Co(2)-O(12)#1 | 91.78(11)  | O(13)-Co(2)-O(12)#1  | 170.22(11) |
| O(14)-Co(2)-O(12)#1  | 85.97(11)  | O(9)-Co(2)-O(7)#4    | 83.97(11)  |
| N(4)#3-Co(2)-O(7)#4  | 172.15(11) | O(13)-Co(2)-O(7)#4   | 91.07(11)  |
| O(14)-Co(2)-O(7)#4   | 93.98(11)  | O(12)#1-Co(2)-O(7)#4 | 82.20(9)   |

## 6

|                    |            |                      |            |
|--------------------|------------|----------------------|------------|
| Co(1)-O(7)#1       | 2.015(3)   | Co(1)-N(5)           | 2.052(3)   |
| Co(1)-N(7)         | 2.062(3)   | Co(1)-O(2)           | 2.211(3)   |
| Co(1)-O(1)         | 2.215(3)   | Co(2)-O(10)#2        | 1.986(2)   |
| Co(2)-O(6)         | 2.010(2)   | Co(2)-N(1)           | 2.032(3)   |
| Co(2)-N(4)#3       | 2.038(3)   |                      |            |
| O(7)#1-Co(1)-N(5)  | 93.40(12)  | O(7)#1-Co(1)-N(7)    | 97.43(14)  |
| N(5)-Co(1)-N(7)    | 111.70(14) | O(7)#1-Co(1)-O(2)    | 113.78(13) |
| N(5)-Co(1)-O(2)    | 95.82(13)  | N(7)-Co(1)-O(2)      | 137.00(14) |
| O(7)#1-Co(1)-O(1)  | 171.69(14) | N(5)-Co(1)-O(1)      | 90.45(14)  |
| N(7)-Co(1)-O(1)    | 87.96(12)  | O(2)-Co(1)-O(1)      | 58.43(12)  |
| O(10)#2-Co(2)-O(6) | 105.92(9)  | O(10)#2-Co(2)-N(1)   | 109.92(10) |
| O(6)-Co(2)-N(1)    | 119.00(11) | O(10)#2-Co(2)-N(4)#3 | 92.88(10)  |
| O(6)-Co(2)-N(4)#3  | 115.86(10) | N(1)-Co(2)-N(4)#3    | 109.83(12) |

Symmetry codes: **1**: #1, - x, - y + 1, - z; **2**: #1, - x + 1, - y + 1, - z; **#2**, - x + 1/2, y - 1/2, - z + 1/2; **#3**, - x + 1, - y + 1, - z + 1/2; **3**: #1, x - 1, y, z; **#2**, - x + 1, - y, - z; **4**: #1, x - 1/2, - y + 1/2, z + 1/2; **#2**, x, y, z + 1; **#3**, x + 1/2, - y + 1/2, z + 1/2; **#4**, - x + 1/2, y - 1/2, - z + 1/2; **5**: #1, - x, - y + 1, - z + 1; **#2**, - x + 1, - y + 1, - z + 1; **#3**, - x, - y, - z; **#4**, - x, - y + 1, - z + 2; **6**: #1, - x + 1, y - 1/2, - z - 1/2; **#2**, - x + 2, - y + 1, - z; **#3**, - x + 2, - y + 2, - z.

**Table S2.** Hydrogen bonds for complexes **1** and **3**. (Å, °)

| D-H...A               | d(D-H) | d(H...A) | d(D...A) | <(DHA) |
|-----------------------|--------|----------|----------|--------|
| <b>1</b>              |        |          |          |        |
| O(4)-H(4A)...O(10)#2  | 0.82   | 1.76     | 2.557(6) | 165    |
| O(6)-H(6A)...O(9)#3   | 0.82   | 1.86     | 2.662(5) | 164    |
| O(7)-H(7A)...O(10)#4  | 0.82   | 2.00     | 2.819(5) | 178    |
| <b>3</b>              |        |          |          |        |
| O(10)-H(10A)...O(2)#4 | 0.82   | 1.86     | 2.673(5) | 171    |
| N(2)-H(2A)...O(5)#5   | 0.86   | 2.02     | 2.755(6) | 143    |
| N(2)-H(2A)...O(8)#6   | 0.86   | 2.33     | 2.929(5) | 127    |
| O(4)-H(4A)...O(1W)    | 0.82   | 1.81     | 2.633(5) | 179    |

Symmetry transformations used to generate equivalent atoms: **1**: #2,  $x-1, y, z$ ; #3,  $-x+1, y-1/2, -z+1/2$ ; #4,  $-x+1, y+1/2, -z+1/2$ ; **3**: #4,  $-x+1, -y+1, -z$ ; #5,  $x-2, -y+1/2, z-1/2$ ; #6,  $-x, y+1/2, -z-1/2$ .

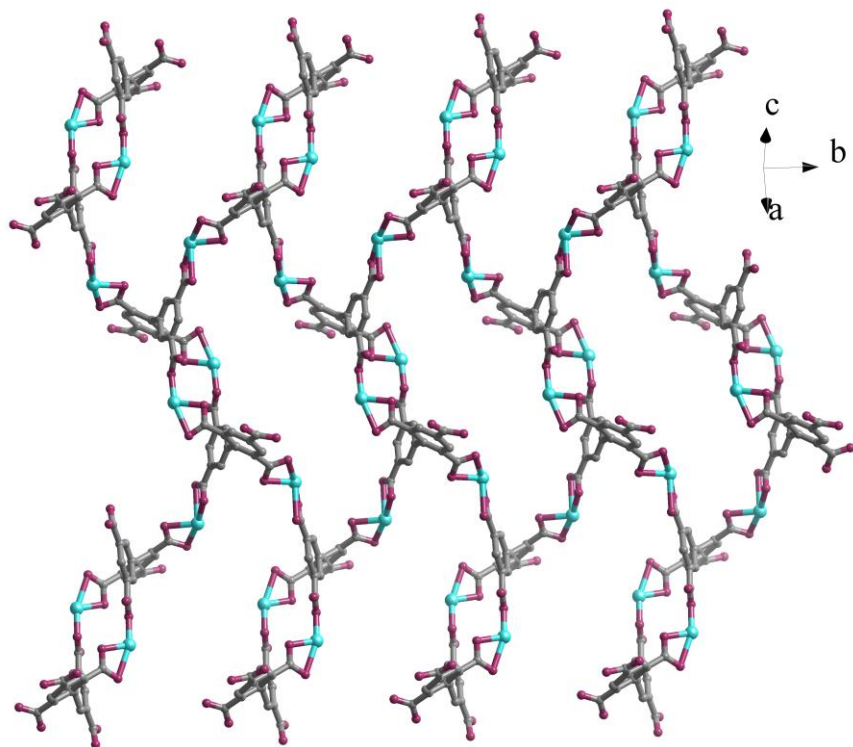

Fig. S1. 2D layer constructed by Co(II) and Hbpc<sup>4-</sup> in **6**.

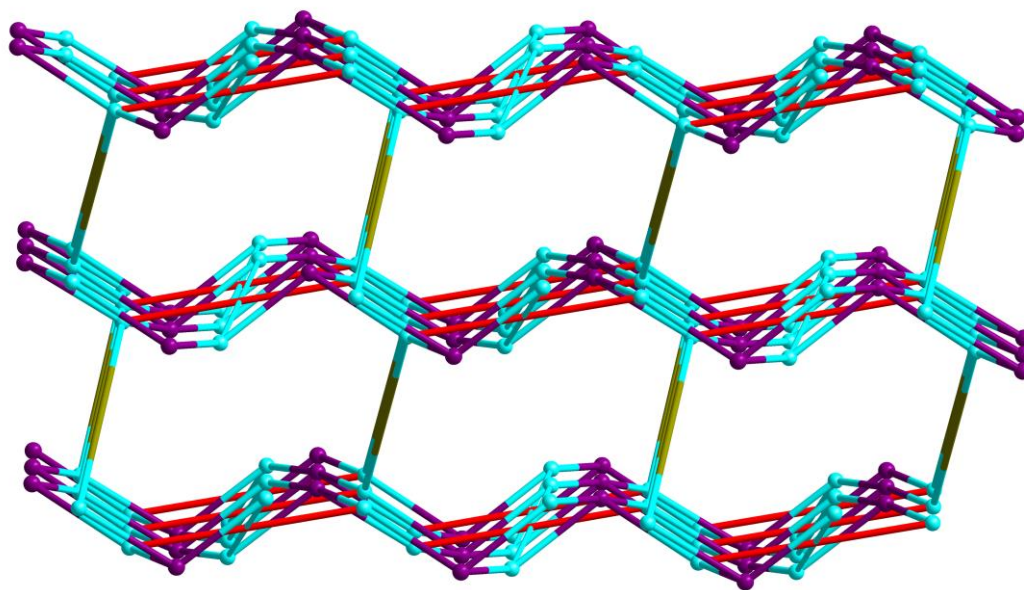

Fig. S2. Schematic representation of the (3,4,4)-connected 3D net.

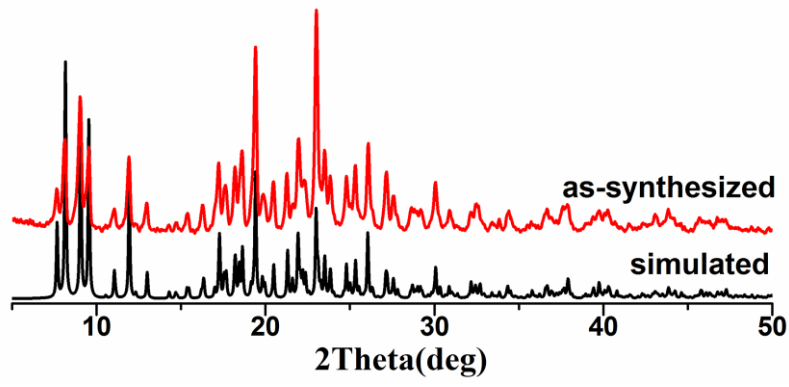

1

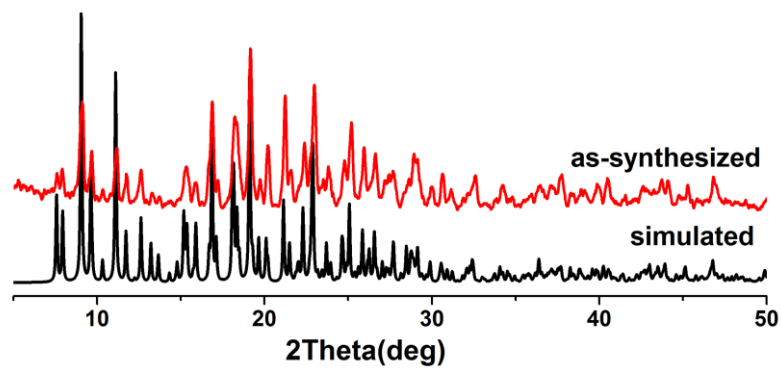

2

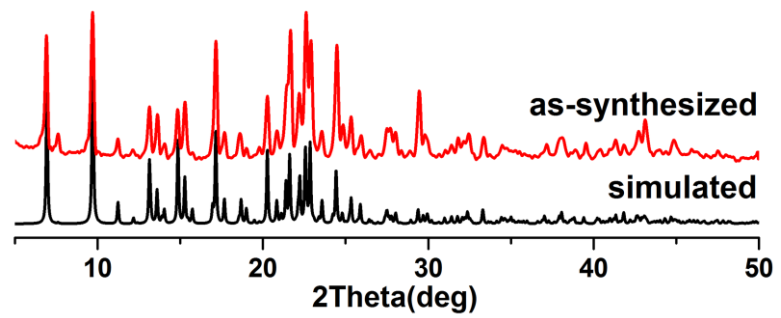

3

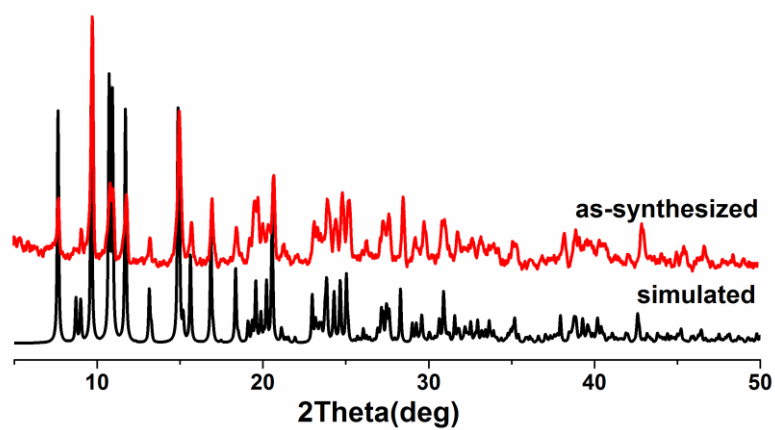

4

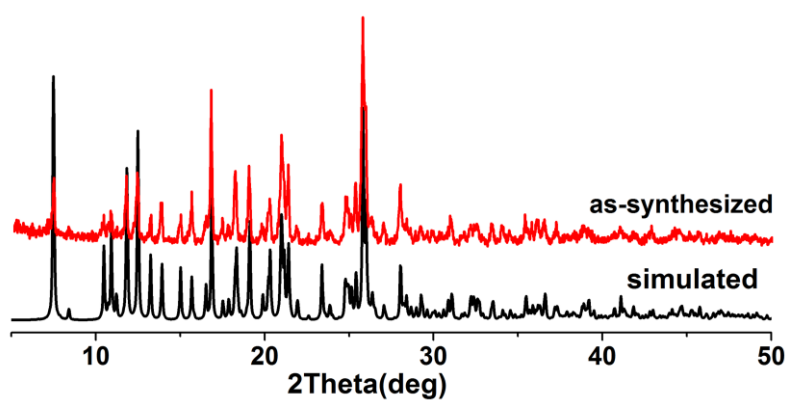

5

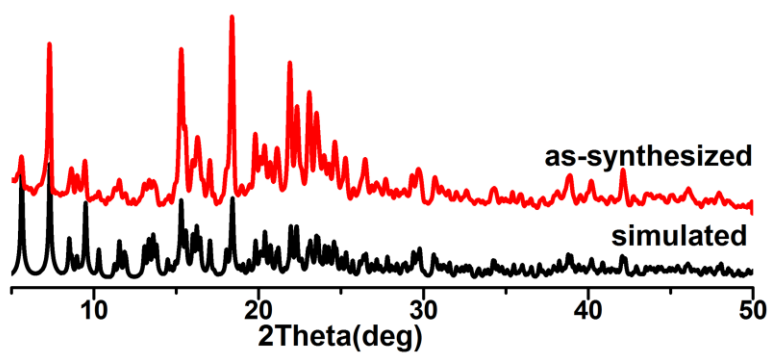

6

Fig. S3. PXRD patterns of the single crystals of complexes 1–6.



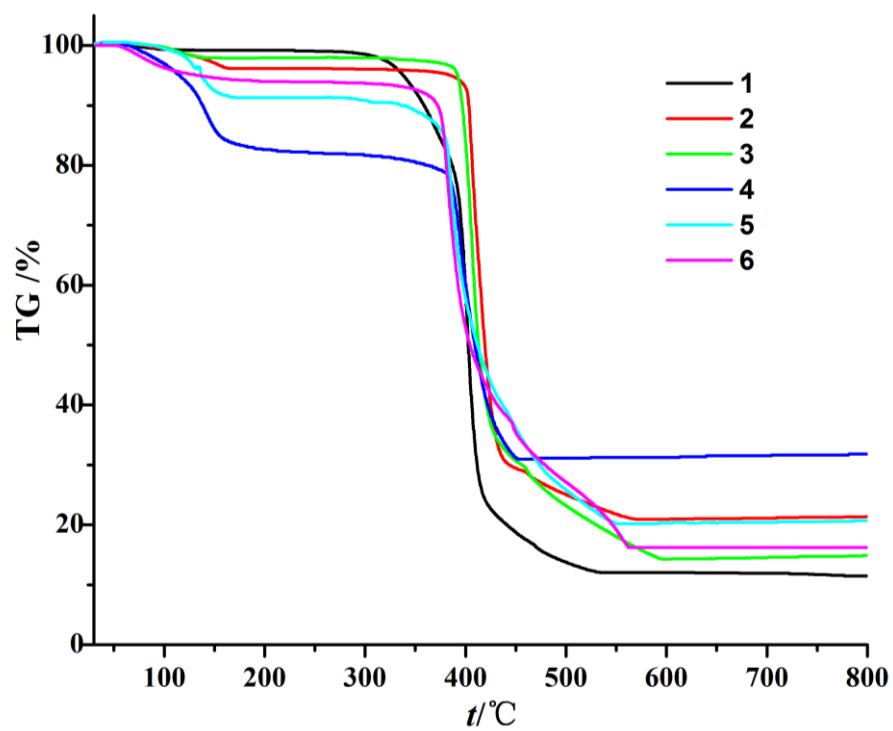

Fig. S4. TGA plots of complexes 1-6.
